# Supplementary material for: New evidence for through-space transmission of substituent effects in benzene derivativesElectronic supplementary information (ESI) available: Table S1 containing literature data for substituent constants and pKa values used in this work. See http://www.rsc.org/suppdata/p2/b1/b106418e/
Source: Royal Society of Chemistry journal article supplement (doi:10.1039/b106418e), 2001-12-14
Supplement: b106418e.doc [file b106418e.doc]

# Supplementary data

| **Table S1** Sigma constants and data for p*K*a at 298 K used in this work | | | | | | | | | | | | | | | |
| --- | --- | --- | --- | --- | --- | --- | --- | --- | --- | --- | --- | --- | --- | --- | --- |
|  | Sigma constants*a* | |  | Phenylethanoic acids*b* in | | | | |  | 3-Phenylpropanoic acids*c* in | | | | | |
|  | 75% EtOHH2O | |  | 50% EtOHH2O | |  | 75% EtOHH2O | |  | | 50% EtOHH2O | |
| Substituent |  |  | |  |  | |  |  | |  |  | |  | |  |
| Special |  |  | |  |  | |  |  | |  |  | |  | |  |
| NMe2 |  | 0.317 | |  | 0.19 | |  | 0.16 | |  |  | |  | |  |
| NH2 | 0.087 | 0.295 | | 0.07 | 0.19 | |  | 0.14 | | 0.07 | 0.12 | |  | | 0.10 |
| OH | 0.023 | 0.221 | | 0.01 | 0.19 | | 0.02 | 0.12 | |  |  | |  | |  |
| OMe | 0.102 | 0.120 | | 0.01 | 0.10 | | 0.04 | 0.06 | |  |  | |  | |  |
| OPh |  | 0.055 | |  | 0.04 | |  | 0.03 | |  |  | |  | |  |
| NHAc |  | 0.002 | |  | 0.02 | |  | 0.04 | |  |  | |  | |  |
| F | 0.335 | 0.151 | | 0.24 | 0.14 | | 0.18 | 0.11 | |  |  | |  | |  |
| Cl | 0.365 | 0.242 | | 0.28 | 0.25 | | 0.19 | 0.19 | | 0.15 |  | | 0.09 | |  |
| Br | 0.369 | 0.265 | | 0.28 | 0.24 | | 0.19 | 0.19 | | 0.17 |  | | 0.09 | |  |
| I | 0.343 | 0.277 | | 0.24 | 0.25 | | 0.16 | 0.22 | |  |  | |  | |  |
| Normal |  |  | |  |  | |  |  | |  |  | |  | |  |
| Bu*t* | 0.087 | 0.150 | | 0.14 | 0.12 | | 0.18 | 0.13 | |  |  | |  | |  |
| Me | 0.062 | 0.135 | | 0.07 | 0.12 | | 0.09 | 0.09 | | 0.03 |  | | 0.04 | |  |
| Pri |  | 0.132 | |  | 0.12 | |  | 0.13 | |  |  | |  | |  |
| H | 0 | 0 | | 0 | 0 | | 0 | 0 | | 0 | 0 | | 0 | | 0 |
| CF3 | 0.464 |  | | 0.34 |  | | 0.24 |  | |  |  | |  | |  |
| CN | 0.622 | 0.714 | | 0.53 | 0.62 | | 0.45 | 0.52 | | 0.31 | 0.36 | | 0.23 | | 0.26 |
| NO2 | 0.713 | 0.814 | | 0.59 | 0.69 | | 0.49 | 0.61 | | 0.32 | 0.41 | | 0.24 | | 0.31 |
| *a* Data from ref. 1*j*. *b* Data from ref. 4*a*,*b*. *c* Data from ref. 4*c*. | | | | | | | | | | | | | | | |
